# Supplementary material
Source: PubMed Central journal article supplement (PMC5380581)
Supplement: NIHMS850315-supplement-1.pdf [file NIHMS850315-supplement-1.pdf]

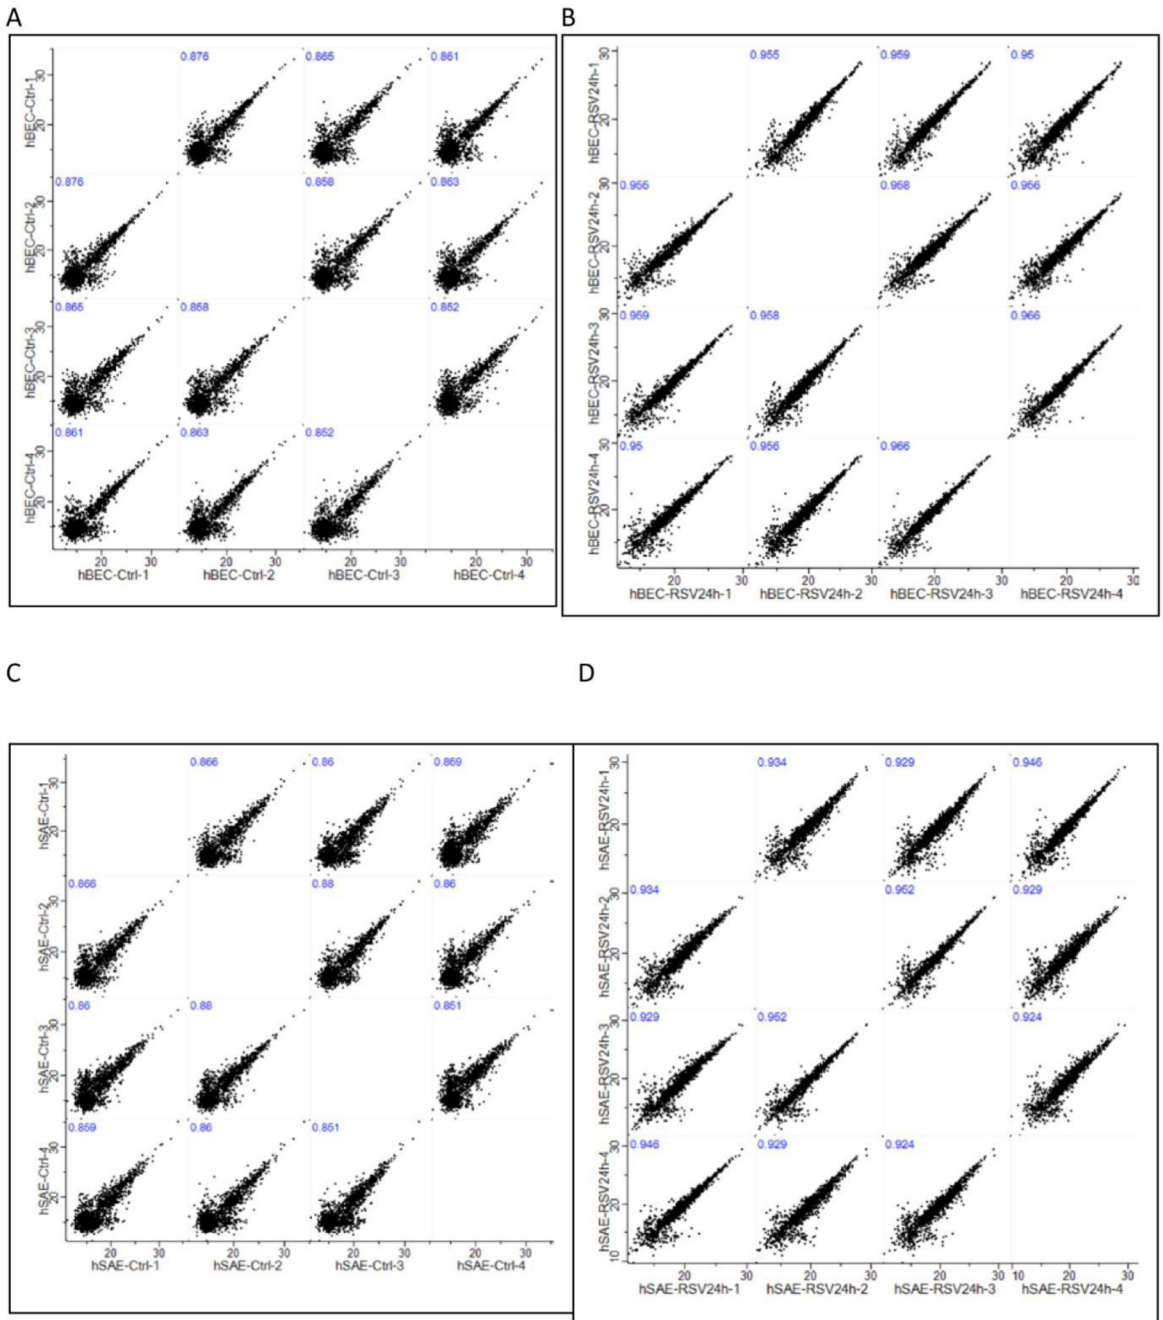

**Supplementary FIG S1. Reproducibility of quantification of the secretome protein quantification in four biological replicates.** Pearson correlation coefficient between the replicates are shown in each plot. A. HBECS, control cells. B. HBECS, RSV infection for 24 h. C. HSAECs, control cells. D. HSAECs, RSV infection for 24 h.

## Supplemental Table I.

| Cell Type | Lot # | Sex    | Age |
|-----------|-------|--------|-----|
| hBEC      | 1     | Male   | 66  |
| hBEC      | 2     | Male   | 67  |
| hBEC      | 3     | Male   | 28  |
| hSAEC     | 1     | Male   | 66  |
| hSAEC     | 2     | Male   | 37  |
| hSAEC     | 3     | Female | 56  |

Donor information for hBEC and hSAECs. Shown for each cell type is lot number (Lot #), Sex, and Age (in years).
